# Supplementary material
Source: Springer Nature journal article supplement (https://www.springermedizin.de/resource/supplementary/12913_2010_1884_MOESM3_ESM.pdf/9529156)

Panel A ACS Time period 1 (1995-2001)

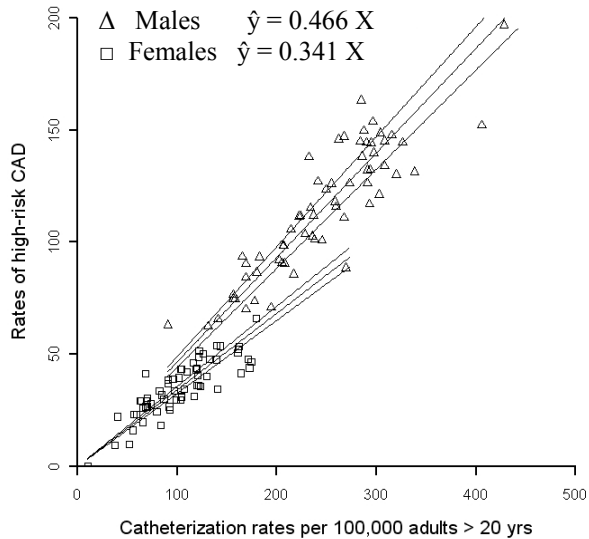

Panel B ACS Time period 2 (2002-2006)

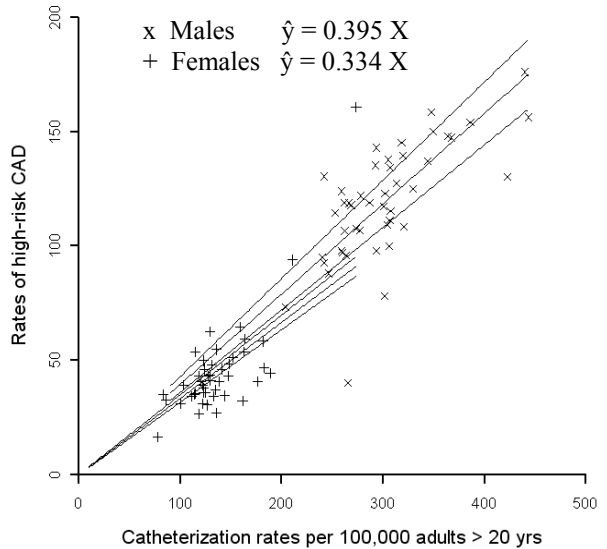

Panel C Non-ACS Time period 1 (1995-2001)

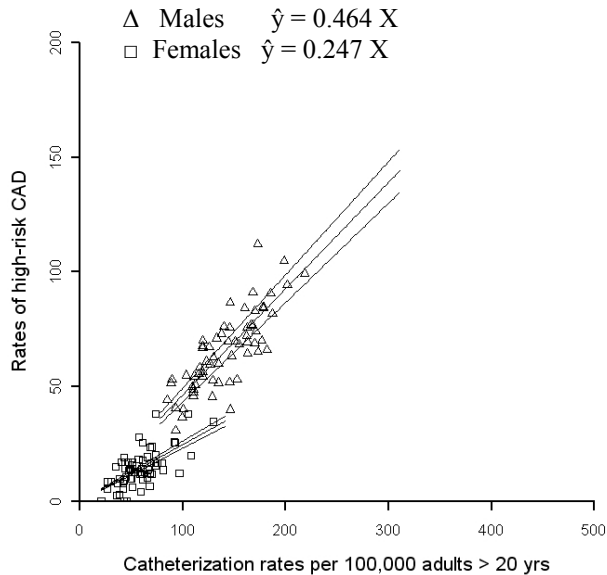

Panel D Non-ACS Time period 2 (2002-2006)

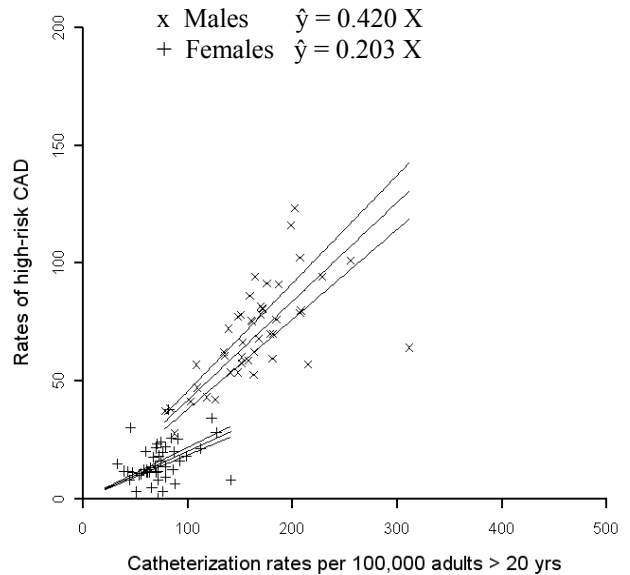

Supplement: MOESM3 [file 9529156]
